# Supplementary material for: A facile, cost-effective, rapid, single-step synthesis of Ag–Cu decorated ZnO nanoflower-like composites (NFLCs) for electrochemical sensing of dopamine
Source: Royal Society of Chemistry journal article supplement (doi:10.1039/d1ma00319d), 2021-01-01
Supplement: d1ma00319d1.pdf [file d1ma00319d1.pdf]

## **Supporting Information**

### **Facile Cost Effective, Rapid Single-Step Synthesis of Ag-Cu Decorated ZnO Nanoflower like Composite (NFLC) for Electrochemical Sensing of Dopamine**

**Srikanth Ponnada<sup>a</sup>, Demudu Babu Gorle<sup>b</sup>, Maryam Sadat Kiai<sup>c\*</sup>, Saravanakumar Rajagopal<sup>d</sup>, Rakesh K Sharma<sup>e\*</sup>, Dr. Annapurna Nowduri<sup>a\*</sup>**

*<sup>a</sup>Department of Engineering Chemistry, Andhra University College of Engineering (A), Visakhapatnam-530003, India.*

*<sup>b</sup>Materials Research Centre, Indian Institute of Science, Bengaluru-560012, India.*

*<sup>c</sup>Nano-Science and Nano-Engineering Program, Graduate School of Science, Engineering and Technology, Istanbul Technical University, Istanbul 34469, Turkey.*

*<sup>d</sup>Department of Chemistry, Thiagarajar College of Engineering, Madurai, Tamil Nadu-625005, India*

*<sup>e</sup>Sustainable Materials and Catalysis Research Laboratory (SMCRL), Department of Chemistry, Indian Institute of Technology Jodhpur, Karwad, Jodhpur-342037, India.*

#### **Author's Full Postal Address**

**\*<sup>a</sup>Srikanth Ponnada**

Inorganic Chemistry Division

Department of Engineering Chemistry

Andhra University College of Engineering (A)

Andhra University.

Visakhapatnam-530003, India

**\*<sup>a</sup>Email-** [koolsreekanth@gmail.com](mailto:koolsreekanth@gmail.com)

**<sup>b</sup>Dr Demudu Babu Gorle**

Materials Research Centre, Indian Institute of Science

Indian Institute of Sciences,

Bangalore-560012,

Karnataka, India

<sup>b</sup>**Email-** demudubabu321@gmail.com

<sup>d</sup>**Saravanakumar Rajagopal**

Department of Chemistry,

Thiagarajar College of Engineering,

Madurai-625015,

Tamil Nadu, India

<sup>d</sup>**Email-** saravanakumaran22@gmail.com

### **Corresponding Author Full Postal Address**

<sup>\*a</sup>**Dr. Annapurna Nowduri**

**Associate Professor**

Inorganic Chemistry Division

Department of Engineering Chemistry

Andhra University College of Engineering (A)

Andhra University

Visakhapatnam-530003, India

<sup>\*a</sup>**Email-** dr.nannapura@andhrauniversity.edu.in, purnaaucevizag@gmail.com

<sup>\*c</sup>**Maryam Sadat Kiai**

Nano-Science and Nano-Engineering Program, Graduate School of Science,

Engineering and Technology,

Istanbul Technical University,

Istanbul-34469, Turkey

<sup>\*c</sup>**Email-** [maryamskiai@gmail.com](mailto:maryamskiai@gmail.com)

**\*<sup>e</sup>Prof Rakesh Kumar Sharma FRSC**

Sustainable Materials and Catalysis Research Laboratory (SMCRL),

Department of Chemistry

Indian Institute of Technology Jodhpur.

Jodhpur-342037

India.

**<sup>e</sup>Email:** rakeshiisc@gmail.com

**Webpage:** <http://home.iitj.ac.in/~rks/> ; <https://rks639.wixsite.com/rksgroup>

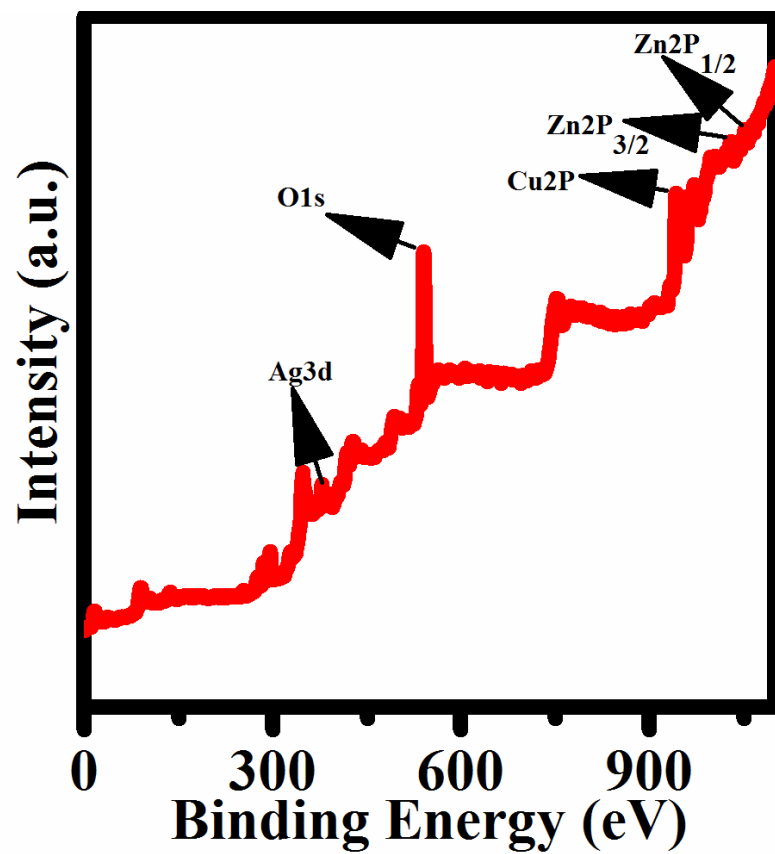

Fig. S1 XPS spectra of Ag-Cu@ZnO Nanoflower like composite.

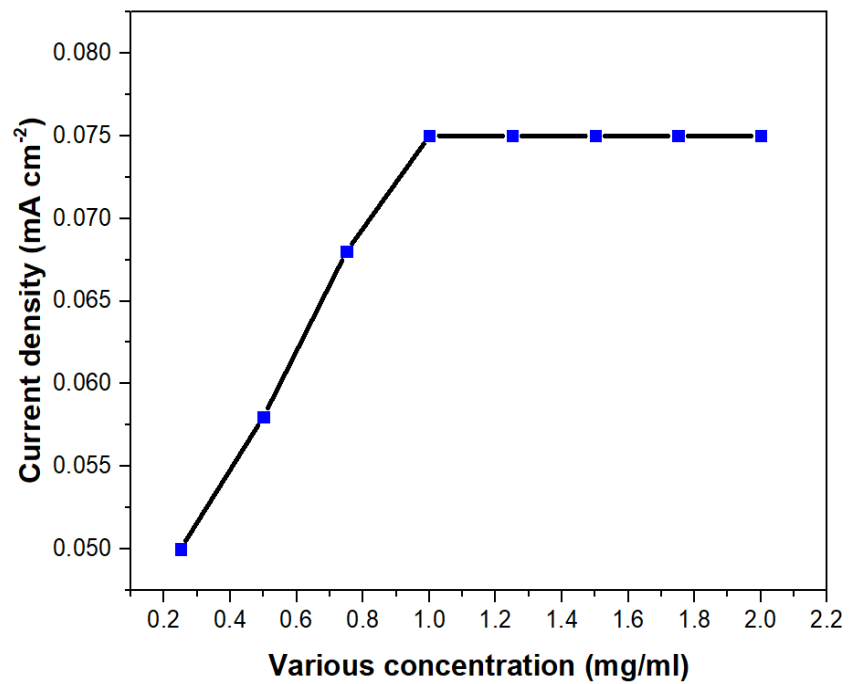

**Fig. S2 Linear plot of concentration addition of DA versus sensitivity.**

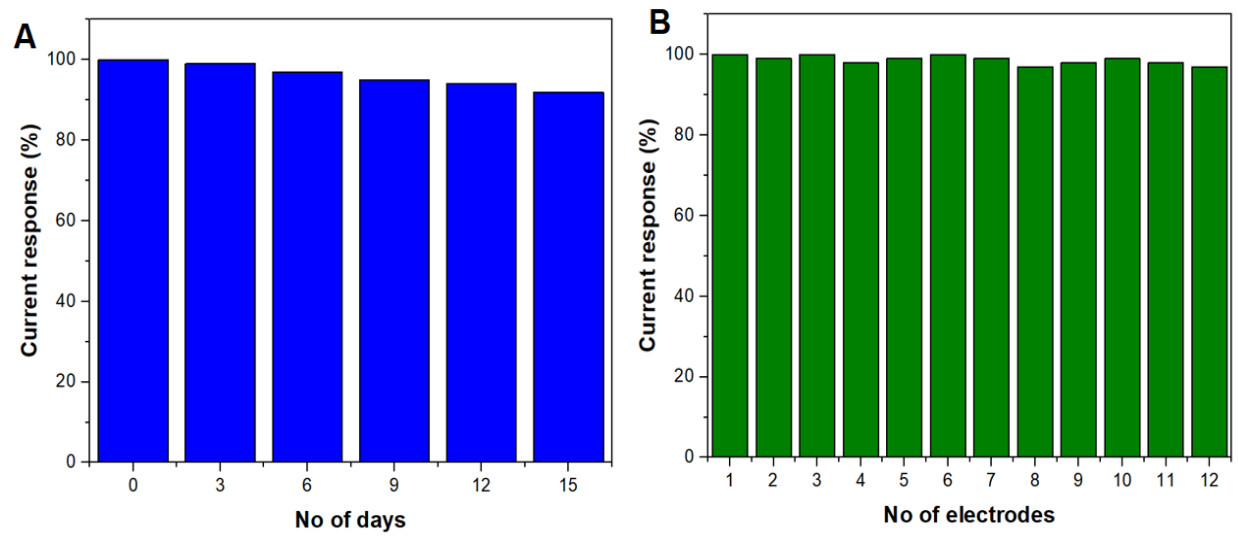

**Fig. S4** The storage stability test of Ag-Cu Decorated/ZnO-NFLC material

**Table-S1 Comparison of the previous reports of different nanomaterials for Electrochemical sensing of Dopamine**

| Sno. | Electrode/Nanomaterials                                                  | Analyte         | LOD ( $\mu\text{M}$ ) (S/N=3) | Sensitivity ( $\mu\text{A}\text{mM}^{-1}\text{cm}^{-2}$ ) | Linear Range ( $\mu\text{M}$ ) | Year             | Ref.             |
|------|--------------------------------------------------------------------------|-----------------|-------------------------------|-----------------------------------------------------------|--------------------------------|------------------|------------------|
| 1    | Onion-like Carbons (OLC)                                                 | Dopamine        | 1.23                          | 0.74                                                      | -                              | 2019             | S1               |
| 2    | 3-D nitrogen doped graphene                                              | Dopamine        | 0.26                          | -                                                         | 1-1000                         | 2021             | S2               |
| 3    | Graphene oxide/tungsten trioxide (GO/WO <sub>3</sub> ) nanocomposite/GCE | Dopamine        | 0.306                         | 0.392                                                     | 0.3 – 1245                     | 2021             | S3               |
| 4    | Cylindrical gold nanoelectrode (CAuNE)                                   | Dopamine        | 5.83                          | -                                                         | 1-100                          | 2018             | S4               |
| 5    | <b>Ag-Cu Decorated/ZnO-NFLC material</b>                                 | <b>Dopamine</b> | <b>0.21</b>                   | <b>0.68</b>                                               | <b>0.1-10</b>                  | <b>This work</b> | <b>This work</b> |

**Table -S2 Recovery rate and standard deviation of the Urine sample in the presence of 1  $\mu\text{M}$  DA**

| Sample       | DA added ( $\mu\text{M}$ ) | Found ( $\mu\text{M}$ ) | Recovery (%) | RSD (%) |
|--------------|----------------------------|-------------------------|--------------|---------|
| Urine sample | 1                          | 1.030                   | 103          | 1.906   |
|              |                            | 1.052                   | 105.2        | 1.906   |
|              |                            | 1.070                   | 107          | 1.906   |

$$\bar{x} = \frac{x_1 + x_2 + x_3}{3}$$

$$\text{Standard deviation, } S = \sqrt{\frac{(x_1 - \bar{x})^2 + (x_2 - \bar{x})^2 + (x_3 - \bar{x})^2}{n-1}}$$

$$\text{Relative standard deviation, RSD} = 100S/\bar{x}$$

## References

- [S1] Ozoemena, O.C., Shai, L.J., Maphumulo, T. and Ozoemena, K.I., 2019. Electrochemical sensing of dopamine using onion-like carbons and their carbon nanofiber composites. *Electrocatalysis*, 10(4), pp.381-391.
- [S2] Jiang, J., Ding, D., Wang, J., Lin, X. and Diao, G., 2021. Three-dimensional nitrogen-doped graphene-based metal-free electrochemical sensors for simultaneous determination of ascorbic acid, dopamine, uric acid, and acetaminophen. *Analyst*, 146(3), pp.964-970.
- [S3] Anbumannan, V., Kumar, R.R. and Suresh, K., 2021. Enhanced electrochemical detection of dopamine by graphene oxide/tungsten trioxide nanocomposite. *Materials Science in Semiconductor Processing*, 127, p.105696.
- [S4] Kim, D.S., Kang, E.S., Baek, S., Choo, S.S., Chung, Y.H., Lee, D., Min, J. and Kim, T.H., 2018. Electrochemical detection of dopamine using periodic cylindrical gold nanoelectrode arrays. *Scientific reports*, 8, pp.1-10.
